# Supplementary material
Source: PubMed Central journal article supplement (PMC5542582)
Supplement: NIHMS881422-supplement.pdf [file NIHMS881422-supplement.pdf]

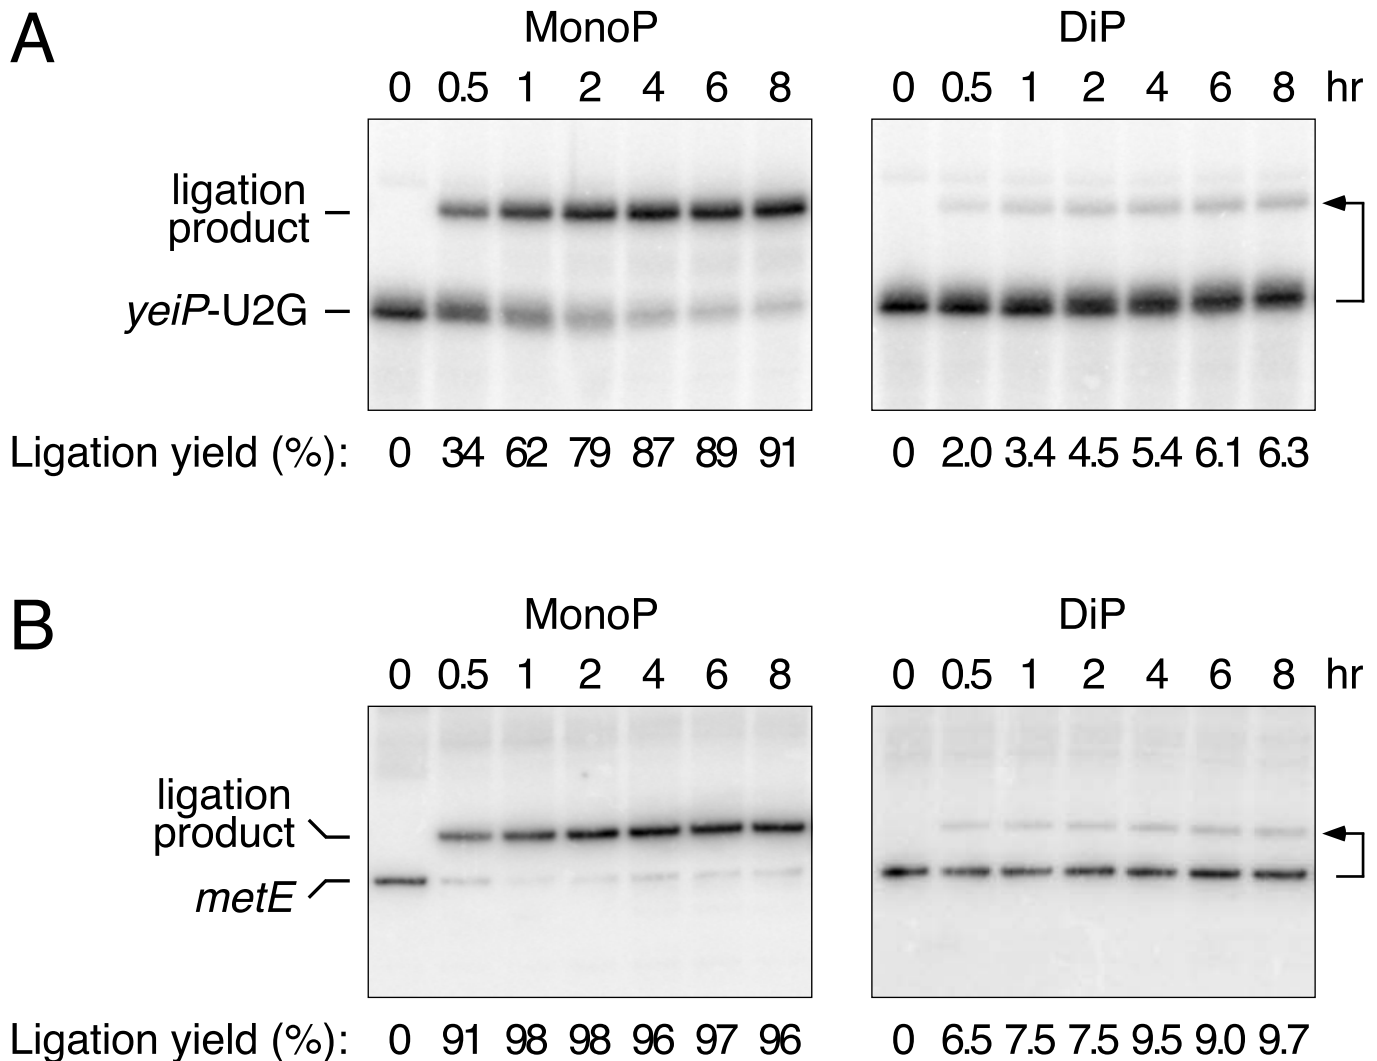

**Figure S1. Relative reactivity of monophosphorylated and diphosphorylated RNA as PABLO substrates** (related to Figures 3 and 4).

The splinted ligation of monophosphorylated (MonoP) and diphosphorylated (DiP) *in vitro* transcripts to a DNA oligonucleotide by T4 DNA ligase was monitored as a function of time in the presence of total *E. coli* RNA to simulate the analysis of an endogenous *E. coli* transcript by PABLO.

(A) *In vitro* transcribed *yeiP*-U2G RNA in the presence of total RNA from  $\Delta yeiP$  cells.

(B) *In vitro* transcribed *metE* RNA in the presence of total RNA from  $\Delta metE$  cells.

A bent arrow leads from the RNA substrate to its ligation product. In each case, the monophosphorylated substrate underwent ligation at least 13 times faster than its diphosphorylated counterpart.

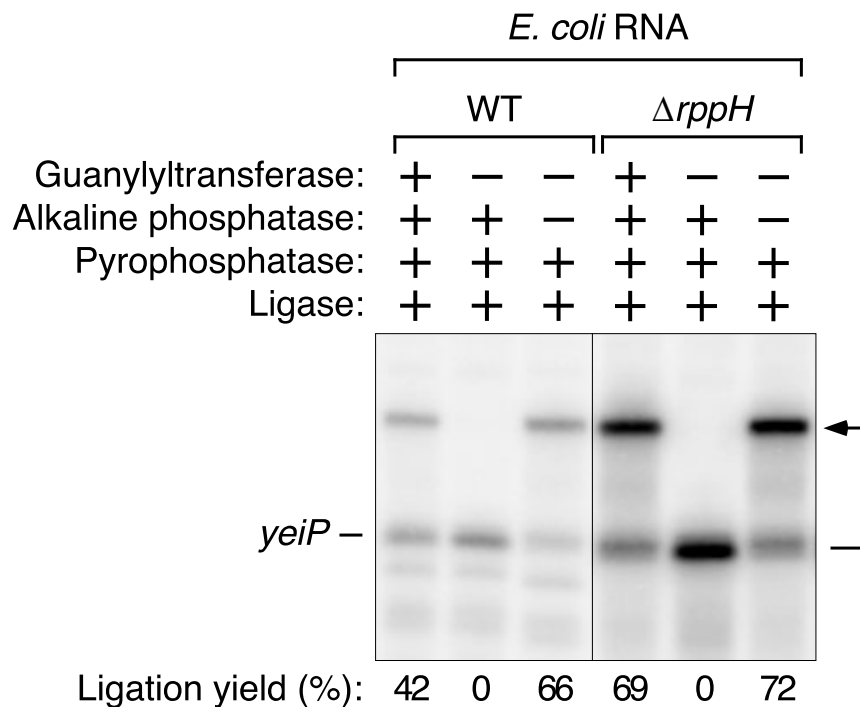

**Figure S2. Detection of diphosphorylated *yeiP* mRNA in *E. coli*** (related to Figure 3). The relative abundance of diphosphorylated *yeiP* mRNA was compared in wild-type (WT) and  $\Delta rppH$  cells by PACO. As determined previously by PABLO (Richards et al., 2012),  $43 \pm 2\%$  of the full-length *yeiP* transcript is monophosphorylated in wild-type cells, whereas almost none is monophosphorylated in  $\Delta rppH$  cells. A bent arrow leads from the RNA substrate to its ligation product. A vertical line marks the location of superfluous lanes omitted from the image.

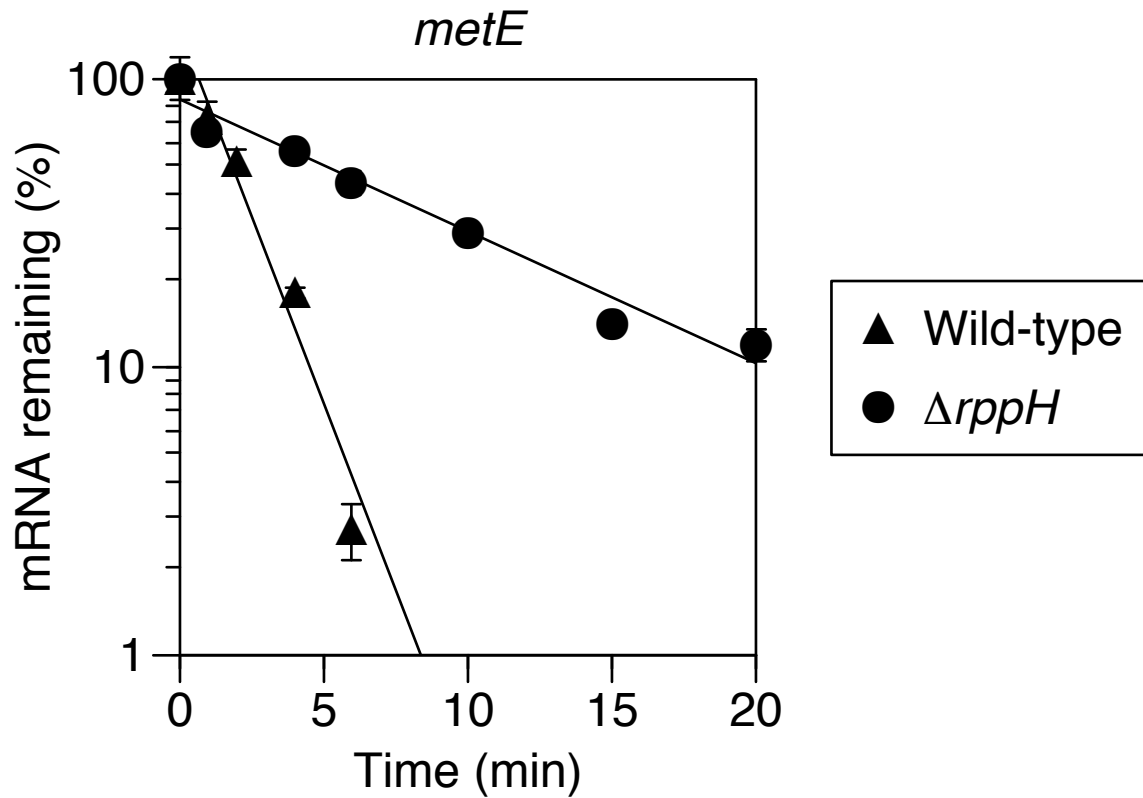

**Figure S3. RppH-dependent decay of *metE* mRNA in *E. coli*** (related to Figure 4). At time intervals after inhibiting transcription with rifampicin, total RNA was extracted from cultures of a pair of isogenic *E. coli* strains containing or lacking RppH, and the ratio of *metE* mRNA to 16S rRNA (a stable internal standard) in each sample was determined by quantitative RT-PCR and plotted semilogarithmically. Error bars represent standard deviations of multiple measurements. The observed half-life of *metE* mRNA increased from  $1.2 \pm 0.2$  min in wild-type cells to  $6.6 \pm 0.5$  min in  $\Delta rppH$  cells.

**A**

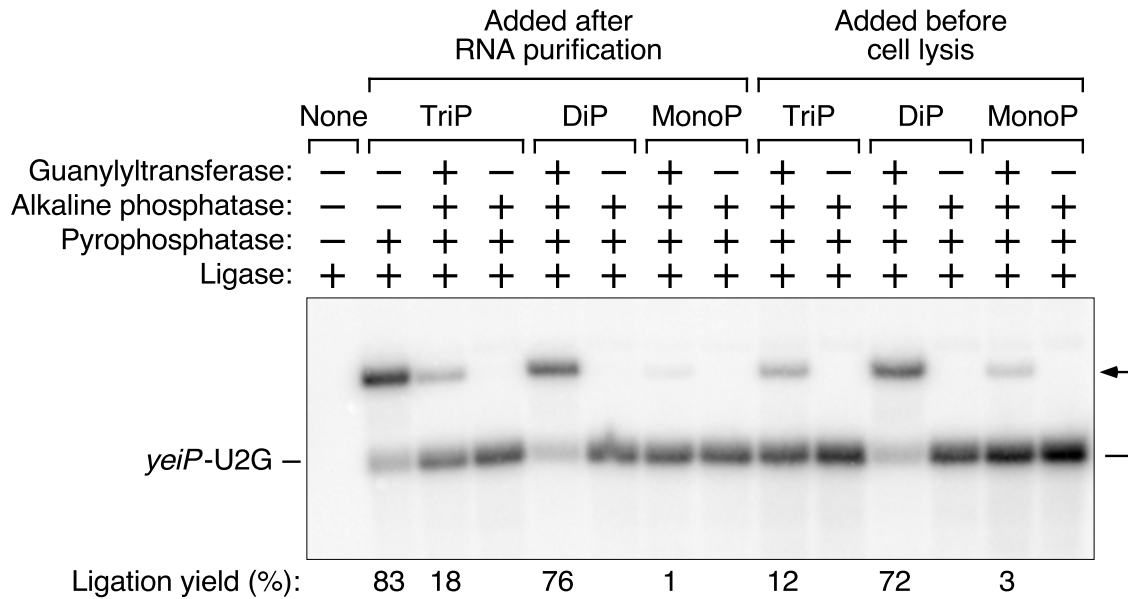

**B**

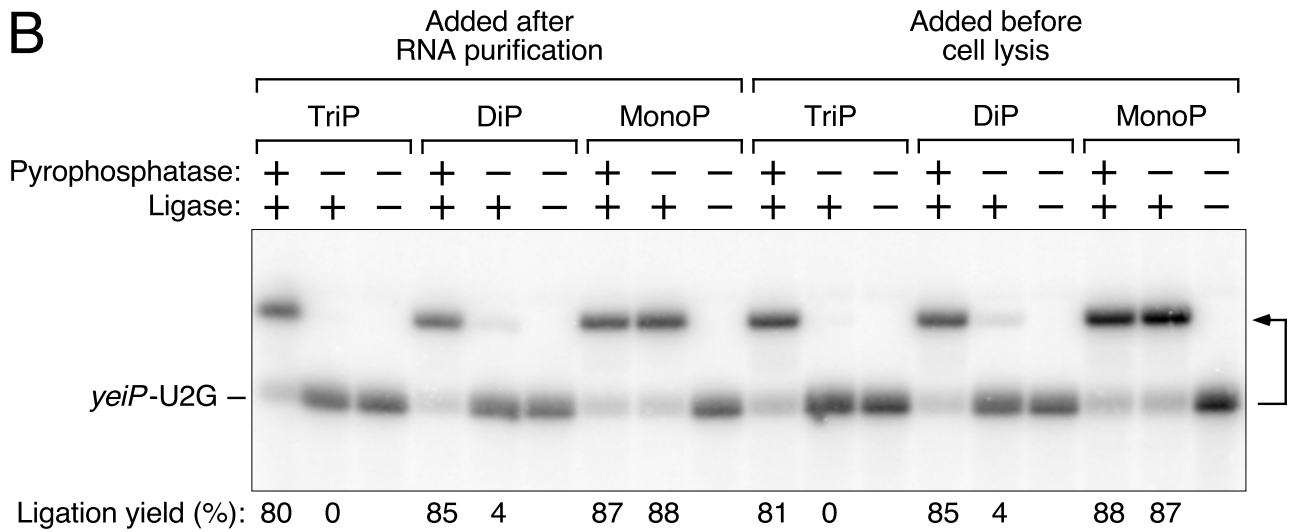

**Figure S4. Unperturbed phosphorylation state of transcripts following RNA extraction from *E. coli*** (related to Figure 3).

Fully triphosphorylated (TriP), diphosphorylated (DiP), or monophosphorylated (MonoP) *yeiP*-U2G RNA that had been synthesized by *in vitro* transcription (1.15 pmol) was added to intact *E. coli* cells from which the *yeiP* gene had been deleted (10 ml of a culture harvested at  $A_{650} = 0.3$ , pelleted, and resuspended), and total RNA was then extracted from those cells. Alternatively, the same *in vitro* transcripts (0.046 pmol) were added to total RNA (5  $\mu$ g) following its extraction and purification from the cells. The phosphorylation state of the transcripts spiked in before or after the extraction procedure was then compared by (A) PACO and (B) PABLO. A bent arrow leads from the RNA substrate to its ligation product.

**Table S1. Relative reactivity of diphosphorylated versus triphosphorylated dinucleotides (related to Figure 2).**

| Time (min) | ppApG             |                    |      | pppApG             |                    |      |
|------------|-------------------|--------------------|------|--------------------|--------------------|------|
|            | DiP remaining (%) | Standard deviation |      | TriP remaining (%) | Standard deviation |      |
| 0          | 100.00            | ±                  | 0.00 | 100.00             | ±                  | 0.00 |
| 1          | 39.69             | ±                  | 0.74 | 89.21              | ±                  | 0.98 |
| 2          | 2.56              | ±                  | 0.28 | 80.04              | ±                  | 1.29 |
| 3          | 0.19              | ±                  | 0.07 | 71.67              | ±                  | 1.69 |
| 4          | 0.00              | ±                  | 0.00 | 64.46              | ±                  | 2.15 |
| 6          | 0.00              | ±                  | 0.00 | 52.37              | ±                  | 2.28 |
| 8          | 0.00              | ±                  | 0.00 | 42.02              | ±                  | 2.32 |
| 10         | 0.00              | ±                  | 0.00 | 34.13              | ±                  | 2.28 |

| Time (min) | ppApA             |                    |      | pppApA             |                    |      |
|------------|-------------------|--------------------|------|--------------------|--------------------|------|
|            | DiP remaining (%) | Standard deviation |      | TriP remaining (%) | Standard deviation |      |
| 0          | 100.00            | ±                  | 0.00 | 100.00             | ±                  | 0.00 |
| 1          | 48.98             | ±                  | 0.01 | 93.65              | ±                  | 1.08 |
| 2          | 9.80              | ±                  | 2.06 | 88.13              | ±                  | 1.62 |
| 3          | 0.60              | ±                  | 0.19 | 83.01              | ±                  | 2.16 |
| 4          | 0.12              | ±                  | 0.00 | 78.19              | ±                  | 2.67 |
| 6          | 0.00              | ±                  | 0.00 | 69.67              | ±                  | 3.49 |
| 8          | 0.00              | ±                  | 0.00 | 62.11              | ±                  | 4.10 |
| 10         | 0.00              | ±                  | 0.00 | 55.28              | ±                  | 4.58 |

| Time (min) | ppApU             |                    |      | pppApU             |                    |      |
|------------|-------------------|--------------------|------|--------------------|--------------------|------|
|            | DiP remaining (%) | Standard deviation |      | TriP remaining (%) | Standard deviation |      |
| 0          | 100.00            | ±                  | 0.00 | 100.00             | ±                  | 0.00 |
| 1          | 54.69             | ±                  | 0.02 | 96.76              | ±                  | 0.83 |
| 2          | 24.65             | ±                  | 1.85 | 93.95              | ±                  | 0.96 |
| 3          | 9.27              | ±                  | 1.47 | 91.44              | ±                  | 1.22 |
| 4          | 3.52              | ±                  | 0.81 | 88.97              | ±                  | 1.17 |
| 6          | 0.00              | ±                  | 0.00 | 84.38              | ±                  | 1.50 |
| 8          | 0.00              | ±                  | 0.00 | 80.05              | ±                  | 1.47 |
| 10         | 0.00              | ±                  | 0.00 | 75.96              | ±                  | 1.61 |

| Time (min) | ppApC             |                    |       | pppApC             |                    |      |
|------------|-------------------|--------------------|-------|--------------------|--------------------|------|
|            | DiP remaining (%) | Standard deviation |       | TriP remaining (%) | Standard deviation |      |
| 0          | 100.00            | ±                  | 0.00  | 100.00             | ±                  | 0.00 |
| 1          | 63.81             | ±                  | 7.86  | 97.49              | ±                  | 0.69 |
| 2          | 38.69             | ±                  | 10.79 | 95.70              | ±                  | 0.97 |
| 3          | 22.62             | ±                  | 10.35 | 93.98              | ±                  | 1.18 |
| 4          | 12.71             | ±                  | 8.17  | 92.71              | ±                  | 1.17 |
| 6          | 4.15              | ±                  | 3.81  | 89.58              | ±                  | 1.51 |
| 8          | 1.40              | ±                  | 1.56  | 86.94              | ±                  | 1.70 |
| 10         | 0.47              | ±                  | 0.59  | 84.28              | ±                  | 1.80 |

**Table S2. Measurements used to calculate the capping efficiencies of *yeiP*-U2G and *metE* standards synthesized by *in vitro* transcription (related to Figures 3 and 4).**

|                  | Measured values  |                  |                  |                  | 5' homogeneity |                |
|------------------|------------------|------------------|------------------|------------------|----------------|----------------|
|                  | Y <sub>TS</sub>  | Y <sub>DS</sub>  | Y <sub>MS</sub>  | E <sub>LS</sub>  | D <sub>S</sub> | M <sub>S</sub> |
| <i>yeiP</i> -U2G | 0.244 ±<br>0.067 | 0.692 ±<br>0.028 | 0.038 ±<br>0.021 | 0.802 ±<br>0.042 | 0.930          | 0.978          |
| <i>metE</i>      | 0.142 ±<br>0.001 | 0.674 ±<br>0.014 | 0.027 ±<br>0.038 | 0.680 ±<br>0.020 | 0.974          | 0.975          |

Y<sub>TS</sub>, Y<sub>DS</sub>, and Y<sub>MS</sub> are the fractional PACO ligation yields obtained for the triphosphorylated, diphosphorylated, and monophosphorylated standards, respectively. E<sub>LS</sub> is the PABLO ligation efficiency of fully monophosphorylated RNA. The Y and E values correspond to the mean and standard deviation of two independent measurements. D<sub>S</sub> and M<sub>S</sub> are the calculated fractions of those standards that are diphosphorylated and monophosphorylated, respectively.

**Table S3. Calculated capping efficiencies of *yeiP*-U2G and *metE* standards synthesized by *in vitro* transcription** (related to Figures 3 and 4).

|                  |                    | Capping efficiencies        |                             |                             |
|------------------|--------------------|-----------------------------|-----------------------------|-----------------------------|
|                  |                    | $E_T$                       | $E_D$                       | $E_M$                       |
| <i>yeiP</i> -U2G | Monte Carlo        | 0.306<br>+ 0.080<br>- 0.089 | 0.900<br>+ 0.064<br>- 0.057 | 0.042<br>+ 0.026<br>- 0.029 |
|                  | Direct calculation | 0.304                       | 0.905                       | 0.042                       |
| <i>metE</i>      | Monte Carlo        | 0.209<br>+ 0.006<br>- 0.007 | 1.014<br>+ 0.035<br>- 0.040 | 0.035<br>+ 0.057<br>- 0.057 |
|                  | Direct calculation | 0.209                       | 1.013                       | 0.035                       |

$E_T$ ,  $E_D$ , and  $E_M$  are the fractional capping efficiencies calculated for triphosphorylated, diphosphorylated, and monophosphorylated RNA, respectively, with 0 being no capping and 1 being complete capping. Each efficiency determined by Monte Carlo simulation corresponds to the peak of an asymmetric distribution, and the error range ( $\pm$ ) corresponds to a confidence level of 68.3%, equivalent to one standard deviation. For comparison, the capping efficiencies were also calculated directly; these values agree well with the peak values obtained by Monte Carlo simulation, but only the simulation allowed error ranges to be determined. A minor discrepancy versus the theoretical maximum (1.000) resulted from the small mathematical correction factors that were used and is within the margin of error.

**Table S4. Measurements used to calculate the phosphorylation state of *yeiP*-U2G and *metE* mRNA in *E. coli* (related to Figures 3 and 4).**

|                  | PACO             |                  |                  |                  | PABLO            |                  |                   |                  |
|------------------|------------------|------------------|------------------|------------------|------------------|------------------|-------------------|------------------|
|                  | Wild-type        |                  | $\Delta rppH$    |                  | Wild-type        |                  | $\Delta rppH$     |                  |
|                  | $Y_D$            | $E_{LD}$         | $Y_D$            | $E_{LD}$         | $Y_M$            | $E_{LM}$         | $Y_M$             | $E_{LM}$         |
| <i>yeiP</i> -U2G | 0.188 ±<br>0.004 | 0.570 ±<br>0.008 | 0.606 ±<br>0.004 | 0.627 ±<br>0.031 | 0.479 ±<br>0.012 | 0.655 ±<br>0.026 | 0.024 ±<br>0.0003 | 0.769 ±<br>0.008 |
| <i>metE</i>      | 0.404 ±<br>0.038 | 0.700 ±<br>0.020 | 0.664 ±<br>0.015 | 0.666 ±<br>0.023 | 0.283 ±<br>0.010 | 0.899 ±<br>0.016 | 0.026 ±<br>0.004  | 0.904 ±<br>0.003 |

The phosphorylation state of *yeiP*-U2G and *metE* mRNA was compared in wild-type and  $\Delta rppH$  *E. coli* cells by PACO and PABLO.  $Y_D$  and  $Y_M$  are the fractional PACO and PABLO ligation yields.  $E_{LD}$  and  $E_{LM}$  are the PABLO ligation efficiencies of fully monophosphorylated RNA. The values listed correspond to the mean and standard deviation of measurements on 2-3 biological replicates.



**Table S5. Phosphorylation state of *yeiP*-U2G and *metE* mRNA in *E. coli* (related to Figures 3 and 4).**

|                  |                    | Diphosphorylated            |                             | Monophosphorylated          |                               |
|------------------|--------------------|-----------------------------|-----------------------------|-----------------------------|-------------------------------|
|                  |                    | Wild-type                   | $\Delta rppH$               | Wild-type                   | $\Delta rppH$                 |
| <i>yeiP</i> -U2G | Monte Carlo        | + 0.060<br>0.343<br>- 0.046 | + 0.134<br>1.082<br>- 0.133 | + 0.033<br>0.706<br>- 0.033 | + 0.008<br>- 0.032<br>- 0.008 |
|                  | Direct calculation | 0.352                       | 1.088                       | 0.707                       | - 0.032                       |
| <i>metE</i>      | Monte Carlo        | + 0.080<br>0.511<br>- 0.070 | + 0.073<br>0.962<br>- 0.062 | + 0.012<br>0.273<br>- 0.015 | + 0.006<br>- 0.051<br>- 0.008 |
|                  | Direct calculation | 0.516                       | 0.968                       | 0.271                       | - 0.051                       |

The phosphorylation state of *yeiP*-U2G and *metE* mRNA was compared in wild-type and  $\Delta rppH$  *E. coli* cells. Each fractional value determined by Monte Carlo simulation corresponds to the peak of an asymmetric distribution, and the error range ( $\pm$ ) corresponds to a confidence level of 68.3%, equivalent to one standard deviation. For comparison, the fractional amounts of diphosphorylated and monophosphorylated *yeiP*-U2G and *metE* mRNA were also calculated directly; these values agree well with the peak values obtained by Monte Carlo simulation, but only the simulation allowed error ranges to be determined. Minor discrepancies versus the theoretical maximum (1.000) or minimum (0.000) resulted from the small mathematical correction factors that were used and are either within the margin of error or close to it. These small differences have no bearing on the conclusion that diphosphorylated mRNA is present and abundant in wild-type *E. coli*.

**Table S6. Nucleotides used for *in vitro* transcription** (related to Star Methods).

| Nucleotide | Vendor            | Catalog number | Nominal purity | Measured purity <sup>1</sup> |
|------------|-------------------|----------------|----------------|------------------------------|
| ATP        | Roche             | 11140965001    | ≥ 98%          | 99.33% ATP<br>0.67% ADP      |
| ADP        | Sigma             | A-5285         | ≥ 95%          | 99.50% ADP<br>0.50% AMP      |
| AMP        | Sigma             | A-1752         | ≥ 99%          | 100% AMP                     |
| GTP        | Roche             | 11140957001    | ≥ 98%          | 99.35% GTP<br>0.65% GDP      |
| GDP        | MP<br>Biomedicals | 02151213       | ~ 98%          | 97.68% GDP<br>2.32% GMP      |
| GMP        | Sigma             | G-8377         | ≥ 99%          | 100% GMP                     |
| CTP        | Roche             | 11140922001    | ≥ 98%          | 99.57% CTP<br>0.43% CDP      |
| UTP        | Roche             | 11140949001    | ≥ 98%          | 99.07% UTP<br>0.93% UDP      |

<sup>1</sup> As determined by anion-exchange chromatography.

**Table S7. Oligonucleotides used in these studies** (related to Star Methods).

| Name            | Sequence                                                           | Purpose                                                                    |
|-----------------|--------------------------------------------------------------------|----------------------------------------------------------------------------|
| T7 metE fwd     | AAAACAAATTAATACGACTCACTA<br>TAGTAAACATCTGGACGGC                    | PCR primer for <i>metE</i> <i>in vitro</i><br>transcription (IVT) template |
| metE rev        | AAAAGACCGGGTGGTATTACCACC<br>CGGTTTGGATTTTACC                       | PCR primer for <i>metE</i> IVT<br>template                                 |
| T7 yeiP-U2G fwd | AAAAGAATTCCAAATTAATACGAC<br>TCACTATTAGATTTTIGACATTTTC<br>GACTACAGG | PCR primer for <i>yeiP</i> -U2G<br>IVT template                            |
| yeiP rev        | AAATTAAAAAAGGGACAGCCTGA<br>GC                                      | PCR primer for <i>yeiP</i> -U2G<br>IVT template                            |
| yeiP 80 rev     | GTAATTCAGTACCATACCTT                                               | PCR primer for truncated<br><i>yeiP</i> -U2G IVT template <sup>1</sup>     |
| yeiP 128 rev    | AGTGGGCGACTGAATATC                                                 | PCR primer for truncated<br><i>yeiP</i> -U2G IVT template <sup>2</sup>     |
| yeiP 444 rev    | TTCCAGATCAACGGTCTGCG                                               | PCR primer for truncated<br><i>yeiP</i> -U2G IVT template <sup>3</sup>     |
| DZmetE214       | TCAGCTCGCGAGGCTAGCTACAAC<br>GAGCAGGCCAAC                           | 10-23 DNase for cleaving<br><i>metE</i> <sup>4</sup>                       |

|                      |                                                 |                                                                                     |
|----------------------|-------------------------------------------------|-------------------------------------------------------------------------------------|
| DZyeiP69             | GTAATTCAGTAGGCTAGCTACAAC<br>GACATACCTTTT        | 10-23 DNase for cleaving<br><i>yeiP</i> and <i>yeiP</i> -U2G <sup>5</sup>           |
| DZyeiP444            | GGTTTCAACGAGGCTAGCTACAAC<br>GATTCCAGATCA        | 10-23 DNase for cleaving<br><i>yeiP</i> -U2G prior to TLC <sup>6</sup>              |
| DZEcIVTa54           | ACCGAACGCAAGGCTAGCTACAAC<br>GAGCCGACCGCA        | 10-23 DNase for cleaving<br>EcIVTa <sup>7</sup>                                     |
| X22                  | GAACAATATGAATGATAACTTG                          | X oligo for PACO/PABLO<br>analysis of <i>yeiP</i> , <i>yeiP</i> -U2G,<br>and EcIVTa |
| X32                  | AAAAAAAAAAGAACAATATGAAT<br>GATAACTTG            | X oligo for PACO/PABLO<br>analysis of <i>metE</i>                                   |
| Y- <i>metE</i>       | TAGCCGTCCAGATGTTTACCAAGT<br>TATCATTCATATTGTTC   | Y oligo for PACO/PABLO<br>analysis of <i>metE</i>                                   |
| Y- <i>yeiP</i>       | AGTCGAAAATGTCAAAAATATCAA<br>GTTATCATTCATATTGTTC | Y oligo for PACO/PABLO<br>analysis of <i>yeiP</i>                                   |
| Y- <i>yeiP</i> -U2G  | AGTCGAAAATGTCAAAAATCTCAA<br>GTTATCATTCATATTGTTC | Y oligo for PACO/PABLO<br>analysis of <i>yeiP</i> -U2G                              |
| Y-EcIVTa             | AGAAGAACAACAGAGAAAGATCA<br>AGTTATCATTCATATTGTTC | Y oligo for PACO analysis of<br>EcIVTa                                              |
| <i>metE</i> probe    | CAGGCCAACGCGAGGGAAACCGA                         | Northern blot probe for <i>metE</i>                                                 |
| <i>yeiP</i> probe    | TTCGTTGCTCTTGGCATCG                             | Northern blot probe for <i>yeiP</i><br>and <i>yeiP</i> -U2G                         |
| EcIVTa probe         | GCCGACCGCACAGGGCAGGG                            | Northern blot probe for<br>EcIVTa                                                   |
| qPCR <i>metE</i> fwd | ATGGTGCGTTGGCTGCGT                              | qPCR primer for <i>metE</i>                                                         |
| qPCR <i>metE</i> rev | CGAGGGAAACCGAGGGTGTG                            | qPCR primer for <i>metE</i>                                                         |
| qPCR 16S fwd         | CTCTTGCCATCGGATGTGCCCA                          | qPCR primer for 16S rRNA                                                            |
| qPCR 16S rev         | CCAGTGTGGCTGGTCATCCTCTCA                        | qPCR primer for 16S rRNA                                                            |

<sup>1</sup> For synthesis of the first 80 nucleotides of *yeiP*-U2G RNA by *in vitro* transcription.

<sup>2</sup> For synthesis of the first 128 nucleotides of *yeiP*-U2G RNA by *in vitro* transcription.

<sup>3</sup> For synthesis of the first 444 nucleotides of *yeiP*-U2G RNA by *in vitro* transcription.

<sup>4</sup> Cuts 214 from the 5' end of *metE*.

<sup>5</sup> Cuts 69 nucleotides from the 5' end of *yeiP* and *yeiP*-U2G.

<sup>6</sup> Cuts 444 nucleotides from the 5' end of *yeiP*-U2G.

<sup>7</sup> Cuts 54 nucleotides from the 5' end of EcIVTa.
